# Supplementary material
Source: PubMed Central journal article supplement (PMC5885859)
Supplement: jamaoncol-4-e171363-s001.pdf [file jamaoncol-4-e171363-s001.pdf]

## Supplementary Online Content

Waxman AJ, Clasen S, Hwang W-T, et al. Carfilzomib-Associated Cardiovascular Adverse Events: A Systematic Review and Meta-Analysis [published online December 28, 2017]. *JAMA Oncol*. doi:10.1001/jamaoncol.2017.4519

**eMethods.** Search strategy for Medline (using PubMed)

**eFigure.** Funnel plot to assess for publication bias or small study effects

**eTable.** Common terminology criteria for adverse events (CTCAE) definitions used to define classes of cardiovascular adverse events

This supplementary material has been provided by the authors to give readers additional information about their work.

## **Supplemental Methods**

### PRISMA Search Strategy:

Databases were searched for the terms “carfilzomib,” “Kyprolis,” and “PX-171” between the dates of January 1<sup>st</sup>, 2007 and January 1<sup>st</sup>, 2017. The search strategy as performed in Medline via PubMed is as follows:

(carfilzomib OR kyprolis OR PX-171) AND ("2007/1/1"[Date - Publication] : "2017/1/1"[Date - Publication])

After reviewing references in PubMed, the same search terms and date ranges were used to query EMBASE and Web of Science for additional references.

**eFigure 1: Funnel plot to assess for publication bias or small study effects.**

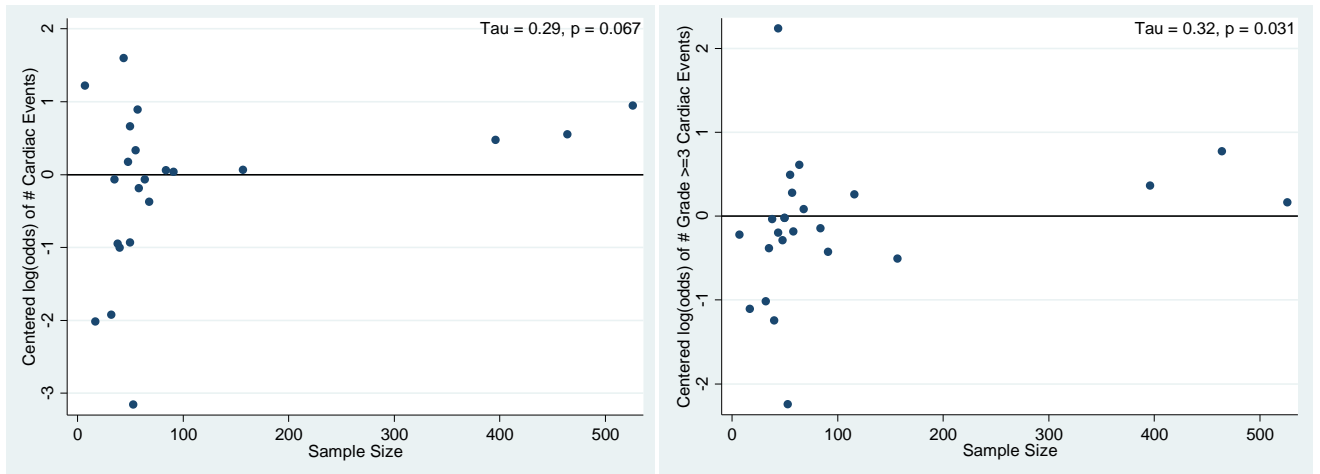

All-grade CVAE (left) and high-grade CVAE (right)

**eTable 1: Common terminology criteria for adverse events (CTCAE) definitions used to define classes of cardiovascular adverse events.**

| <b>Adverse Event Class</b> | <b>CTCAE Name</b>                     | <b>CTCAE Subsection</b> |
|----------------------------|---------------------------------------|-------------------------|
| <b>Heart Failure</b>       | Heart Failure                         | Cardiac Disorders       |
|                            | Left Ventricular Systolic Dysfunction | Cardiac Disorders       |
|                            | Right Ventricular Dysfunction         | Cardiac Disorders       |
|                            | Ejection Fraction Decreased           | Investigations          |
| <b>Hypertension</b>        | Hypertension                          | Vascular Disorders      |
| <b>Myocardial Ischemia</b> | Acute Coronary Syndrome               | Cardiac Disorders       |
|                            | Chest Pain - Cardiac                  | Cardiac Disorders       |
|                            | Myocardial Infarction                 | Cardiac Disorders       |
|                            | Cardiac Troponin I Increased          | Investigations          |
|                            | Cardiac Troponin T Increased          | Investigations          |
| <b>Cardiac Arrhythmia</b>  | Atrial Fibrillation                   | Cardiac Disorders       |
|                            | Atrial Flutter                        | Cardiac Disorders       |
|                            | Atrioventricular Block                | Cardiac Disorders       |
|                            | Conduction Disorder                   | Cardiac Disorders       |
|                            | Palpitations                          | Cardiac Disorders       |
|                            | Paroxysmal Atrial Tachycardia         | Cardiac Disorders       |
|                            | Sick Sinus Syndrome                   | Cardiac Disorders       |
|                            | Supraventricular Tachycardia          | Cardiac Disorders       |
|                            | Ventricular Arrhythmia                | Cardiac Disorders       |
|                            | Ventricular Tachycardia               | Cardiac Disorders       |
| <b>Cardiac Arrest</b>      | Asystole                              | Cardiac Disorders       |
|                            | Cardiac Arrest                        | Cardiac Disorders       |
|                            | Ventricular Fibrillation              | Cardiac Disorders       |
